# Supplementary material for: Transcription Factor σB Plays an Important Role in the Production of Extracellular Membrane-Derived Vesicles in Listeria monocytogenes
Source: PLoS One. 2013 Aug 20;8(8):e73196. doi: 10.1371/journal.pone.0073196 (PMC3748028; doi:10.1371/journal.pone.0073196)
Supplement: Table S5 — Gene Ontology (GO) terms that were significant (p < 0.05) in the extracellular membrane vesicle (MV) proteins derived from only wild-type L. monocytogenes. (XLS) [file pone.0073196.s006.xls]

## Sheet: Sheet1
Table S5.
No	Category	GO ID	GO Term	count_wt	P value_wt	genes_wt
1	MF	GO0051082	unfolded protein binding	3	0.0115573	clpX, dnaJ, dnaK
2	MF	GO0003924	GTPase activity	4	0.00669351	lmo1272, lepA, infB, ftsZ
3	MF	GO0003723	RNA binding	8	0.0408544	rpsM, lmo0241, tyrS, rplO, rplI, lmo1027, rplY, rplB
4	MF	GO0016209	antioxidant activity	3	0.0313356	kat, sodA, tpx
5	MF	GO0005515	protein binding	11	0.00199672	lmo1721, lmo1851, lmo2155, clpC, clpB, inlB, clpX, dnaJ, dnaK, pdhC, lmo2451
6	BP	GO0006259	DNA metabolic process	10	0.0426281	lmo2155, parC, clpC, parE, uvrA, lmo0330, gyrB, xseA, dnaJ, recA
7	BP	GO0009308	amine metabolic process	14	0.0211345	pdxT, tyrS, ami, lysS, lmo2229, gatB, dat, dapH, alaS, pbpA, glmS, glnA, folD, cysK
8	BP	GO0043038	amino acid activation	4	0.0161745	tyrS, lysS, gatB, alaS
9	BP	GO0006520	cellular amino acid metabolic process	11	0.0275899	glmS, tyrS, pdxT, lysS, glnA, gatB, folD, dat, dapH, alaS, cysK
10	BP	GO0034645	cellular macromolecule biosynthetic process	20	0.0143958	lmo2155, lmo1084, infC, rpsM, tyrS, lysS, lmo2229, gatB, lmo1081, dnaJ, alaS, pbpA, parC, parE, rplO, rplI, rpsI, infB, rplY, rplB
11	BP	GO0044260	cellular macromolecule metabolic process	31	0.0042953	infC, lmo2155, lmo2229, gatB, alaS, lmo0241, parC, parE, rplI, rpsI, infB, rplY, lmo1084, rpsM, lmo1820, tyrS, clpC, lysS, uvrA, prsA2, clpX, lmo1081, dnaJ, dnaK, pbpA, rplO, lmo0330, gyrB, xseA, rplB, recA
12	BP	GO0045226	extracellular polysaccharide biosynthetic process	2	0.0397923	lmo1084, lmo1081
13	BP	GO0046379	extracellular polysaccharide metabolic process	2	0.0397923	lmo1084, lmo1081
14	BP	GO0009059	macromolecule biosynthetic process	20	0.0196541	lmo2155, lmo1084, infC, rpsM, tyrS, lysS, lmo2229, gatB, lmo1081, dnaJ, alaS, pbpA, parC, parE, rplO, rplI, rpsI, infB, rplY, rplB
15	BP	GO0044238	primary metabolic process	50	0.0416718	lmo2155, infC, lmo2229, pycA, dapH, lmo1851, parC, parE, clpP, rplI, rpsI, infB, fbaA, rpsM, tyrS, ami, uvrA, prsA2, glpD, pbpA, rplO, glnA, clpP1, gyrB, recA, glpK, pdhA, gatB, dat, alaS, glmS, lmo0241, clpB, lacD, rplY, lmo1084, lmo1820, pdxT, clpC, lysS, lmo1081, clpX, dnaJ, dnaK, lmo0330, folD, xseA, pykA, cysK, rplB
16	BP	GO0006457	protein folding	4	0.00801818	prsA2, clpX, dnaJ, dnaK
17	BP	GO0006950	response to stress	9	0.0376365	kat, clpC, uvrA, tpx, clpB, dnaJ, dnaK, lmo2673, recA
18	BP	GO0043039	tRNA aminoacylation	4	0.0161745	tyrS, lysS, gatB, alaS
19	BP	GO0006418	tRNA aminoacylation for protein translation	4	0.0161745	tyrS, lysS, gatB, alaS
20	BP	GO0016051	carbohydrate biosynthetic process	6	0.0427458	lmo1084, pbpA, glmS, lmo2229, pycA, lmo1081
21	BP	GO0044106	cellular amine metabolic process	11	0.0425221	glmS, tyrS, pdxT, lysS, glnA, gatB, folD, dat, dapH, alaS, cysK
22	CC	GO0005622	intracellular	31	0.00151029	kat, infC, lmo2155, pycA, alaS, glmS, parC, clpP, parE, rplI, rpsI, infB, clpB, rplY, ackA1, ftsZ, rpsM, tyrS, lysS, uvrA, glpD, dnaJ, ezrA, lmo1721, lmo1272, glnA, rplO, gyrB, xseA, rplB, recA
